# Supplementary material
Source: MDPI journal article supplement (https://www.mdpi.com/2073-4344/7/8/237)
Supplement: s1 [file s1]

# Supplementary Materials: Facile, One-Pot, Two-Step, Strategy for the Production of Potential Bio-Diesel Candidates from Fructose

Guo Qiu <sup>a</sup>, Xincheng Wang<sup>b\*</sup>, Chongpin Huang<sup>a\*</sup>, Yingxia Li <sup>a</sup>, and Biaohua Chen<sup>a</sup>

## 1. Characterization of SiO<sub>2</sub>-HNO<sub>3</sub>

The BET surface area and average pore diameter remain stable under acid modification, but the total acid sites of SiO<sub>2</sub>-HNO<sub>3</sub> increased significantly (Table S1), possibly due to the activation of the Si-O bond, forming more silicon hydroxyl groups after the acid treatment. The XRD and <sup>29</sup>Si NMR analysis were also performed and no distinct differences were observed between the original silica gel and the acid-modified one, confirming that the structure of silica gel was maintained after acidification (Figures S1 and S2).

**Table S1.** Characterization of the catalysts based on silica gel.

| Catalyst                               | Untreated silica gel | SiO <sub>2</sub> -HNO <sub>3</sub> |
|----------------------------------------|----------------------|------------------------------------|
| BET surface area (m <sup>2</sup> /g)   | 372                  | 376                                |
| Average pore diameter (nm)             | 12.3                 | 12.1                               |
| Total acid sites (nmol/g) <sup>a</sup> | 0.009                | 0.037                              |

<sup>a</sup> Determined by NH<sub>3</sub>-TPD analysis.

**Table S2.** Characterization of the reused catalysts SiO<sub>2</sub>-HNO<sub>3</sub>.

| Run   | BET surface area (m <sup>2</sup> /g) | Average pore diameter (nm) | Total acid sites (nmol/g) <sup>a</sup> |
|-------|--------------------------------------|----------------------------|----------------------------------------|
| Fresh | 376                                  | 12.1                       | 0.037                                  |
| 1     | 372                                  | 11.9                       | 0.033                                  |
| 2     | 370                                  | 11.6                       | 0.032                                  |
| 3     | 365                                  | 11.0                       | 0.029                                  |
| 4     | 362                                  | 10.9                       | 0.026                                  |
| 5     | 357                                  | 10.4                       | 0.023                                  |

<sup>a</sup> Determined by NH<sub>3</sub>-TPD analysis.

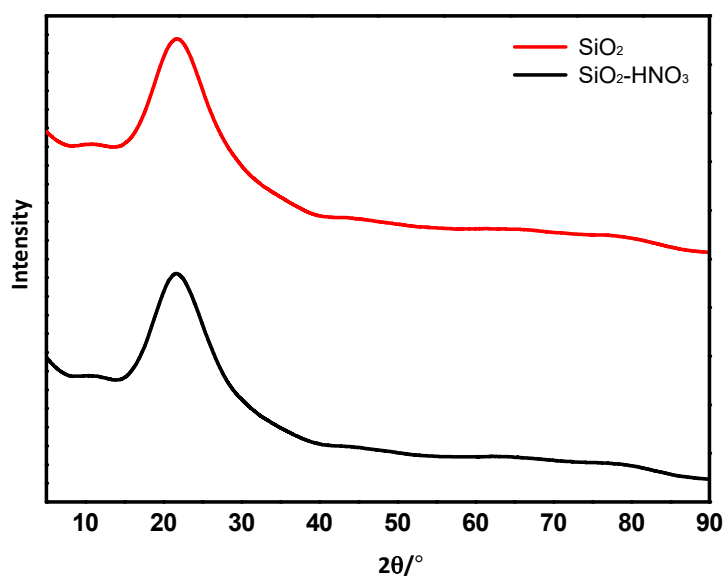

Figure S1. XRD analysis of  $\text{SiO}_2\text{-HNO}_3$ .

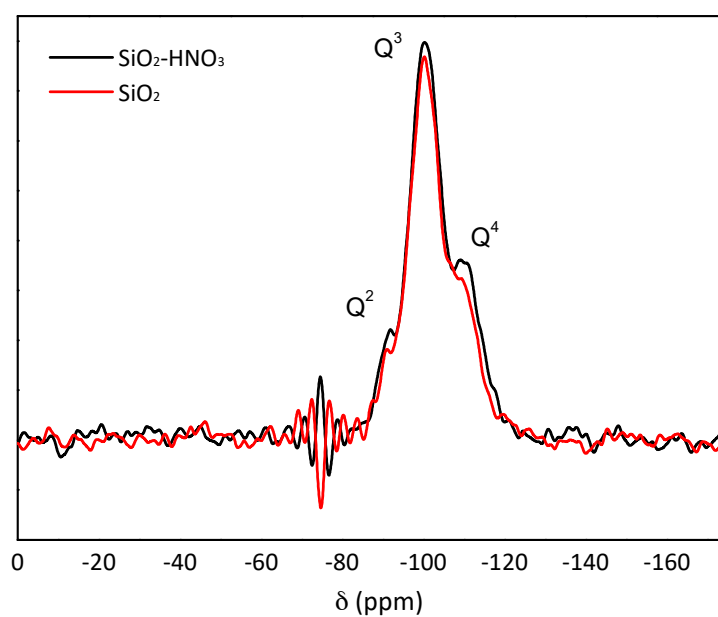

Figure S2.  $^{29}\text{Si}$  NMR analysis of  $\text{SiO}_2\text{-HNO}_3$ .

The FTIR spectra of  $\text{SiO}_2\text{-HNO}_3$  exhibits characteristic bands at 1105, 804 and  $470\text{ cm}^{-1}$  corresponds to asymmetric stretching, symmetric stretching and bending vibrations modes of Si-O-Si bonds, respectively (Figure S3) [1,2]. The bands at 3437 and  $1633\text{ cm}^{-1}$  could be attributed to the stretching and bending O-H vibrations in Si-OH groups, respectively [3,4]. The sharp band at  $1343\text{ cm}^{-1}$  was ascribed to the N-O symmetric stretch, indicating the existence of residual  $\text{NO}_3^-$ .

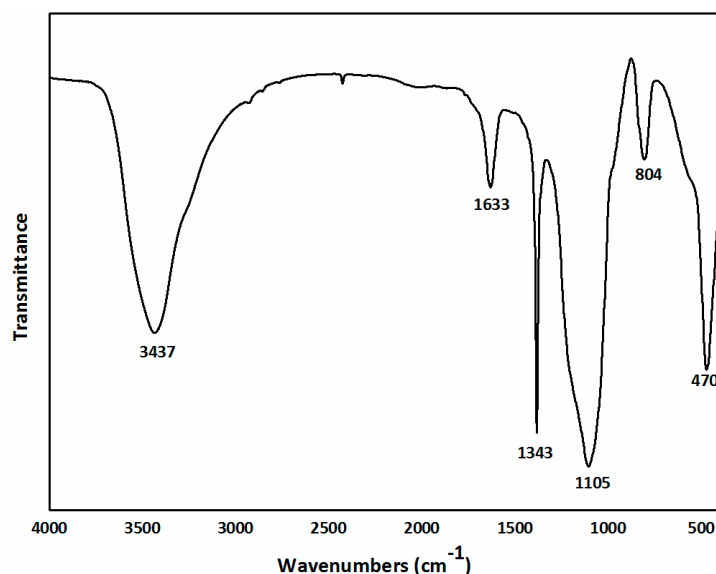

Figure S3. FTIR spectra of SiO<sub>2</sub>-HNO<sub>3</sub>.

## 2. Spectral Data of HDMF, MMF, and DMMF

**HDMF.** <sup>1</sup>H NMR (600 MHz, DMSO) δ 6.62 (dd, *J* = 20.4, 5.9 Hz, 2H), 6.54 – 6.31 (m, 29H), 6.25 (t, *J* = 4.2 Hz, 19H), 5.68 – 5.51 (m, 5H), 5.49 – 5.38 (m, 20H), 5.33 – 5.17 (m, 21H), 4.67 – 4.36 (m, 33H), 4.36 (s, 22H), 3.33 (s, 68H), 3.31 – 3.20 (m, 144H), 3.20 – 3.07 (m, 4H), 2.59 – 2.43 (m, 26H), 2.17 (s, 2H), 1.32 – 1.09 (m, 7H), 1.21 – 1.09 (m, 4H), 1.21 – 1.07 (m, 4H).

**MMF.** <sup>1</sup>H NMR (600 MHz, DMSO) δ 9.58 (s, 45H), 7.51 (d, *J* = 3.5 Hz, 50H), 6.73 (d, *J* = 3.5 Hz, 50H), 4.47 (s, 122H), 3.57 (s, 24H), 3.48 – 3.10 (m, 378H), 2.71 (t, *J* = 6.5 Hz, 16H), 2.58 – 2.27 (m, 133H), 2.27 – 2.14 (m, 6H), 2.10 (s, 23H).

**DMMF.** <sup>1</sup>H NMR (600 MHz, DMSO) δ 6.43 – 6.39 (m, 4H), 6.38 (s, 2H), 5.42 (d, *J* = 6.2 Hz, 3H), 4.32 (s, 7H), 3.26 (t, *J* = 30.0 Hz, 35H), 2.50 (dt, *J* = 3.5, 1.7 Hz, 2H).

## 3. The catalytic performance of the untreated silica gel in the two-step process.

The catalytic effectiveness of the untreated silica gel was investigated for the reaction of the produced 5-HMF from fructose and methanol into HDMF in DMSO. Contrastive profiles of the substrate and products with the untreated silica gel or SiO<sub>2</sub>-HNO<sub>3</sub> after 2 h are shown in Figure S4. Completed conversions of fructose were obtained when either catalysts were used, indicating that silica gel could efficiently promote the dehydration of the fructose to 5-HMF. However, when catalyzed by untreated silica gel, an optimum HDMF yield of 20% was obtained, while the SiO<sub>2</sub>-HNO<sub>3</sub> possessed a HDMF yield of 70%, which was attributed to the lower acid sites on the untreated silica gel. Therefore, the acid-treatment silica gel was more effective than the untreated silica gel for the production of HDMF from fructose.

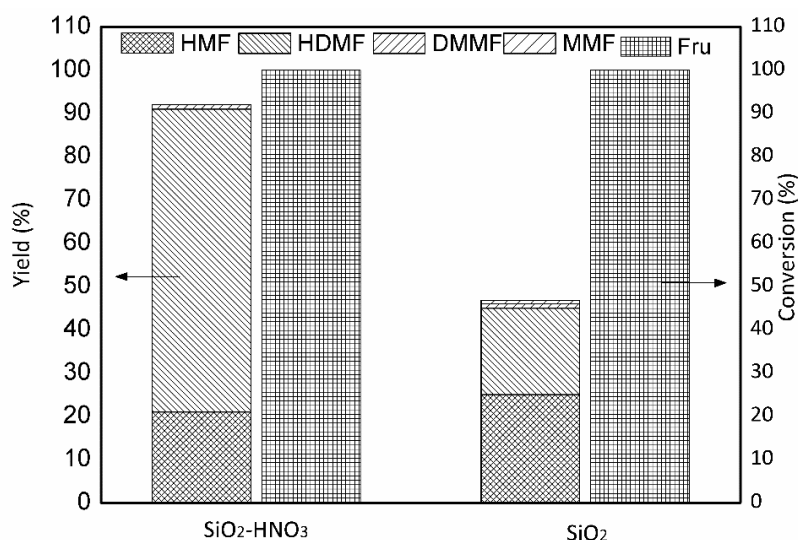

**Figure S4.** Effect of acid-treatment on the activity of the silica gel in the two-step reaction. Reaction conditions: 1.37 mmol fructose in 4.0 mL DMSO at 150 °C with 50 mg SiO<sub>2</sub>-HNO<sub>3</sub> or SiO<sub>2</sub>; after 2 h, 9.3 mL methanol was added and the reaction time was extended to 3 h at 100 °C.

#### 4. A kinetic analysis of the various involved reactions depending on the reaction medium

Kinetic analyses of both the 5-HMF conversion in the methanol and fructose conversion over SiO<sub>2</sub>-HNO<sub>3</sub> in the DMSO/methanol system were performed (Table S3–S6). Both conversions were identified as first-order reactions. The value of the pseudo-first-order rate constant (*k*) was obtained by plotting the values of  $\ln(1-x)$  (where *x* is the conversion of 5-HMF or fructose) against the reaction time (*t*). In Table S3 and S5, the value of *k* increases with increasing the temperature, indicating that a higher reaction temperature accelerated the 5-HMF and fructose conversion reaction rates. The kinetic parameters for the SiO<sub>2</sub>-HNO<sub>3</sub>-catalyzed 5-HMF conversion in the methanol and fructose conversion in the DMSO/methanol system are summarized in Tables S3 and S5, respectively. The apparent activation energy of 5-HMF conversion was 63.3 kJ·mol<sup>−1</sup>, which was lower than that of fructose in the DMSO/methanol system; a possible explanation was that 5-HMF itself was an intermediate product in the conversion of fructose and the protic solvent (methanol) interfered the fructose conversion in the DMSO/methanol system.

**Table S3.** Rate constants (*k*) of 5-HMF conversion with methanol at different reaction temperatures<sup>a</sup>

| Entry | Temperature (K) | <i>k</i> (min <sup>−1</sup> ) | Correlation coefficient |
|-------|-----------------|-------------------------------|-------------------------|
| 1     | 393             | 0.0277                        | 0.9923                  |
| 2     | 403             | 0.0437                        | 0.9941                  |
| 3     | 413             | 0.0791                        | 0.9945                  |
| 4     | 423             | 0.1043                        | 0.9982                  |

<sup>a</sup> Conditions: 0.77 mmol 5-HMF in 4.0 mL of methanol with 26 mg of SiO<sub>2</sub>-HNO<sub>3</sub>, 30 min.

**Table S4.** Kinetic parameters of 5-HMF conversion with methanol

| Parameter                                        | Value             |
|--------------------------------------------------|-------------------|
| reaction order, n                                | 1                 |
| activation energy, $E_a$ (kJ·mol <sup>-1</sup> ) | 63.3              |
| pre-exponential factor, $A$ (min <sup>-1</sup> ) | $7.2 \times 10^6$ |
| correlation coefficient                          | 0.99              |

**Table S5.** Rate constants ( $k$ ) of fructose conversion at different reaction temperatures in the DMSO/methanol system <sup>a</sup>

| Entry | Temperature (K) | $k$ (min <sup>-1</sup> ) | Correlation coefficient |
|-------|-----------------|--------------------------|-------------------------|
| 1     | 393             | 0.0167                   | 0.9964                  |
| 2     | 403             | 0.036                    | 0.9925                  |
| 3     | 413             | 0.0771                   | 0.9971                  |
| 4     | 423             | 0.1137                   | 0.9956                  |

<sup>a</sup> Conditions: 1.37 mmol fructose, 50 mg SiO<sub>2</sub>-HNO<sub>3</sub>, 4.0 mL solvent (DMSO/methanol 30/70 v/v), 30 min.

**Table S6.** Kinetic parameters of the fructose conversion in the DMSO/methanol system

| Parameter                                        | Value                 |
|--------------------------------------------------|-----------------------|
| reaction order, n                                | 1                     |
| activation energy, $E_a$ (kJ·mol <sup>-1</sup> ) | 90.28                 |
| pre-exponential factor, $A$ (min <sup>-1</sup> ) | $1.77 \times 10^{10}$ |
| correlation coefficient                          | 0.9854                |

## References

1. Timin, A.S.; Solomonov, A.V.; Musabirov, I.I.; Sergeev, S.N.; Ivanov, S.P.; Rumyantsev, E.V.; Goncharenko, A. Immobilization of bovine serum albumin onto porous poly (vinylpyrrolidone)-modified silicas. *Ind. Eng. Chem. Res.* **2014**, *53*, 13699–13710.
2. Lenza, R.F.S.; Nunes, E.H.M.; Vasconcelos, D.C.L.; Vasconcelos, W.L. Preparation of sol-gel silica samples modified with drying control chemical additives. *J. Non-Cryst. Solids* **2015**, *423–424*, 35–40.
3. Sanjini, N.S.; Velmathi, S. CuO Impregnated mesoporous silica KIT-6: A simple and efficient catalyst for benzene hydroxylation by C-H activation and styrene epoxidation reactions. *J. Porous Mater.* **2016**, *23*, 1527–1535.
4. Meeks, N.D.; Smuleac, V.; Stevens, C.; Bhattacharyya, D. Iron-based nanoparticles for toxic organic degradation: Silica platform and green synthesis. *Ind. Eng. Chem. Res.* **2012**, *51*, 9581–9590.

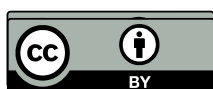

© 2017 by the authors. Submitted for possible open access publication under the terms and conditions of the Creative Commons Attribution (CC-BY) license (<http://creativecommons.org/licenses/by/4.0/>).
